# Supplementary material
Source: PubMed Central journal article supplement (PMC2876656)
Supplement: supp_84_12_6177__1.pdf [file supp_84_12_6177__1.pdf]

## Supplementary Information

SUPPLEMENTARY FIG. 1. MCC phylogeny of the CP and RdRp genes of CYDV, using isolates for which sequences are available for both genes. The isolate colors (blue, red and black) denote the major clusters observed in the CP phylogeny. The tree is rooted through use of a relaxed molecular clock. Asterisks indicate nodes with posterior probabilities  $\geq 0.90$ .

SUPPLEMENTARY FIG. 2. MCC phylogeny of the CP and RdRp genes of ScYLV, using isolates for which sequences are available for both genes. The isolate colors (blue, red and black) denote the major clusters observed in the CP phylogeny. The tree is rooted through use of a relaxed molecular clock. Asterisks indicate nodes with posterior probabilities  $\geq 0.90$ .

# CP

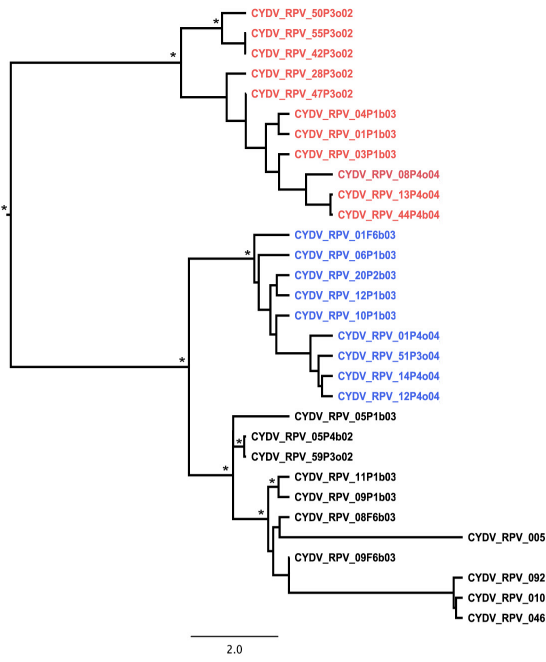

# RdRp

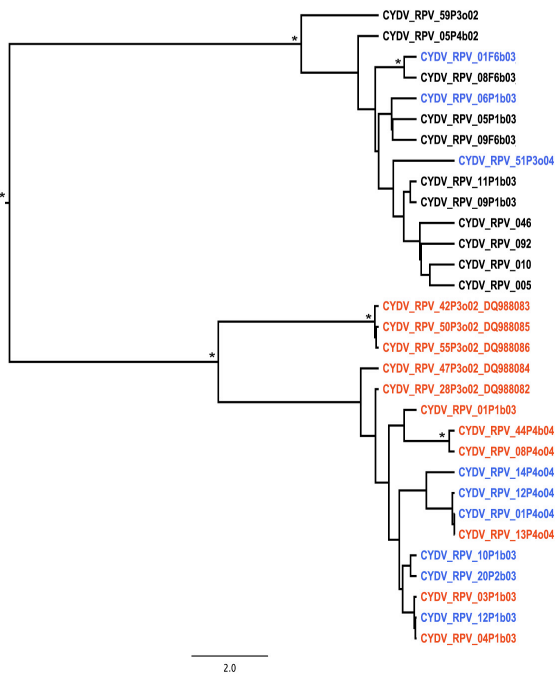

SUPPLEMENTARY FIG. 1

CP

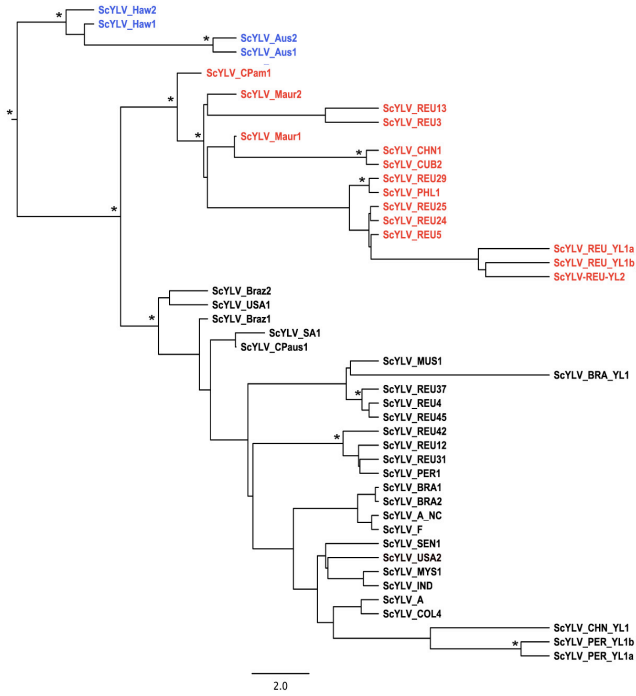

RdRp

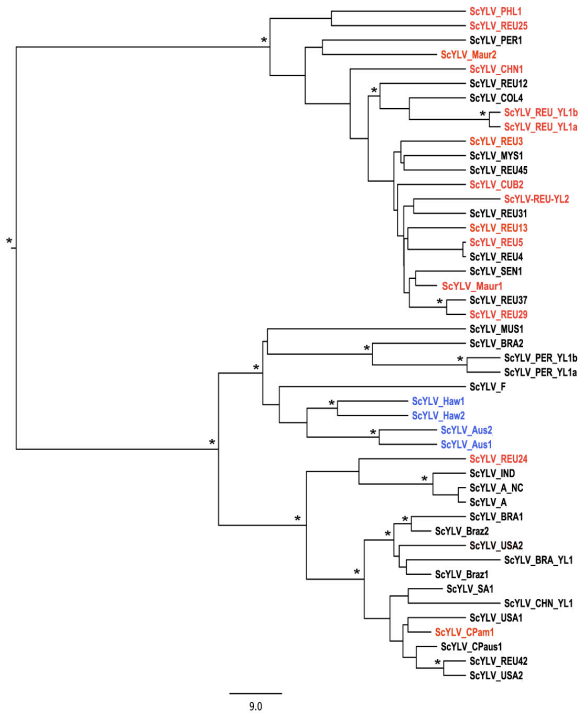

SUPPLEMENTARY FIG. 2

SUPPLEMENTARY TABLE 1. Summary of sequence data, country of origin, and date of isolation of *Barley yellow dwarf virus* isolates.

| Accession N° | Gene*      | Isolate origin | Date      |
|--------------|------------|----------------|-----------|
| AJ007918     | CP/MP      | Morocco        | 1995      |
| AJ007919     | CP/MP      | Morocco        | 1995      |
| AJ007920     | CP/MP      | Morocco        | 1995      |
| AJ007921     | CP/MP      | Morocco        | 1995      |
| AJ007922     | CP/MP      | Morocco        | 1995      |
| AJ007923     | CP/MP      | Morocco        | 1995      |
| AJ007924     | CP/MP      | Morocco        | 1995      |
| AJ007925     | CP/MP      | Morocco        | 1995      |
| AJ007926     | CP/MP      | Morocco        | 1995      |
| AJ007927     | CP/MP      | Morocco        | 1995      |
| AJ007928     | CP/MP      | Morocco        | 1994      |
| AJ007929     | CP/MP      | Morocco        | 1995      |
| AJ223586     | CP/MP      | France         | 1990s     |
| AJ223587     | CP/MP      | France         | 1990s     |
| AJ223588     | CP/MP      | France         | 1990s     |
| AJ223589     | CP/MP      | France         | 1990s     |
| AJ563410     | CP/MP      | Latvia         | 2000-2001 |
| AJ563411     | CP/MP      | Latvia         | 2000-2001 |
| AJ563412     | CP/MP      | Sweden         | 2001      |
| AJ563413     | CP/MP      | Latvia         | 2000-2001 |
| AJ563414     | CP/MP      | Latvia         | 2000-2001 |
| AJ563415     | CP/MP      | Sweden         | 2001      |
| AJ563416     | CP/MP      | Sweden         | 2001      |
| AJ563417     | CP/MP      | Sweden         | 2001      |
| AJ563418     | CP/MP      | Latvia         | 2000-2001 |
| AJ563419     | CP/MP      | Latvia         | 2000-2001 |
| AY040343     | CP/MP/RTD  | France         | 1985      |
| AY040344     | CP/MP/RTD  | France         | 1996      |
| AY167108     | CP/MP      | France         | 1997      |
| AY167109     | CP/MP      | France         | 1997      |
| AY450454     | CP/MP/RTD  | Iran           | 2001      |
| AY879231     | RdRp/CP/MP | USA            | 2000      |
| AY926496     | RdRp       | Finland        | 1998      |
| DQ115530     | CP/MP      | USA            | 2000      |
| DQ115531     | CP/MP      | USA            | 2000      |
| DQ115532     | CP/MP      | USA            | 1917      |
| DQ115533     | CP/MP      | USA            | 1925      |
| DQ118372     | CP/MP/RTD  | USA            | 1940      |
| DQ285671     | CP/MP      | USA            | 2004      |
| DQ285672     | CP/MP      | USA            | 2004      |
| DQ285673     | CP/MP      | USA            | 2004      |
| DQ285674     | CP/MP      | USA            | 2004      |
| DQ285675     | CP/MP      | USA            | 2004      |
| DQ285676     | CP/MP      | USA            | 2004      |
| DQ285677     | CP/MP      | USA            | 2004      |
| DQ285678     | CP/MP      | USA            | 2004      |

|          |       |     |      |
|----------|-------|-----|------|
| DQ285680 | CP/MP | USA | 2004 |
| DQ285681 | CP/MP | USA | 2004 |
| DQ286375 | RdRp  | USA | 2004 |
| DQ286376 | RdRp  | USA | 2004 |
| DQ286377 | RdRp  | USA | 2004 |
| DQ286378 | RdRp  | USA | 2004 |
| DQ286379 | RdRp  | USA | 2004 |
| DQ286380 | RdRp  | USA | 2004 |
| DQ286381 | RdRp  | USA | 2004 |
| DQ286384 | RdRp  | USA | 2004 |
| DQ286385 | RdRp  | USA | 2004 |
| DQ286386 | RdRp  | USA | 2004 |
| DQ535182 | RTD   | USA | 2004 |
| DQ631840 | CP/MP | USA | 2002 |
| DQ631841 | CP/MP | USA | 2002 |
| DQ631842 | CP/MP | USA | 2003 |
| DQ631843 | CP/MP | USA | 2002 |
| DQ631844 | CP/MP | USA | 1925 |
| DQ631845 | CP/MP | USA | 1942 |
| DQ631846 | CP/MP | USA | 1921 |
| DQ631847 | CP/MP | USA | 2002 |
| DQ631848 | CP/MP | USA | 2002 |
| DQ631849 | CP/MP | USA | 2002 |
| DQ631850 | CP/MP | USA | 2002 |
| DQ631851 | CP/MP | USA | 2002 |
| DQ631852 | CP/MP | USA | 2002 |
| DQ631853 | CP/MP | USA | 2002 |
| DQ631854 | CP/MP | USA | 2002 |
| DQ631855 | CP/MP | USA | 2002 |
| DQ631856 | CP/MP | USA | 1924 |
| DQ631857 | CP/MP | USA | 1936 |
| DQ680114 | CP/MP | USA | 2003 |
| DQ680115 | CP/MP | USA | 2003 |
| DQ680116 | CP/MP | USA | 2003 |
| DQ680117 | CP/MP | USA | 2003 |
| DQ680118 | CP/MP | USA | 2003 |
| DQ680119 | CP/MP | USA | 2003 |
| DQ680120 | CP/MP | USA | 2003 |
| DQ680121 | CP/MP | USA | 2003 |
| DQ680122 | CP/MP | USA | 2003 |
| DQ680123 | CP/MP | USA | 2003 |
| DQ680124 | CP/MP | USA | 2003 |
| DQ680125 | CP/MP | USA | 2003 |
| DQ680126 | CP/MP | USA | 2003 |
| DQ680127 | CP/MP | USA | 2003 |
| DQ680128 | CP/MP | USA | 2003 |
| DQ680129 | CP/MP | USA | 2003 |
| DQ680130 | CP/MP | USA | 2003 |
| DQ680131 | CP/MP | USA | 2003 |
| DQ680132 | CP/MP | USA | 2003 |

|          |            |     |      |
|----------|------------|-----|------|
| DQ680133 | CP/MP      | USA | 2003 |
| DQ680134 | CP/MP      | USA | 2003 |
| DQ680135 | CP/MP      | USA | 2003 |
| DQ680136 | CP/MP      | USA | 2003 |
| DQ680137 | CP/MP      | USA | 2004 |
| DQ680138 | CP/MP      | USA | 2004 |
| DQ680139 | CP/MP      | USA | 2004 |
| DQ680140 | CP/MP      | USA | 2004 |
| DQ683252 | CP/MP      | USA | 2003 |
| DQ792506 | RdRp/CP/MP | USA | 2003 |
| DQ907011 | CP/MP      | USA | 2002 |
| DQ907012 | CP/MP      | USA | 2002 |
| DQ907013 | CP/MP      | USA | 2002 |
| DQ907014 | CP/MP      | USA | 2002 |
| DQ907015 | CP/MP      | USA | 2002 |
| DQ907016 | CP/MP      | USA | 2002 |
| DQ907017 | CP/MP      | USA | 2002 |
| DQ907018 | CP/MP      | USA | 2002 |
| DQ907019 | CP/MP      | USA | 2002 |
| DQ907020 | CP/MP      | USA | 2002 |
| DQ907021 | CP/MP      | USA | 2002 |
| DQ907022 | CP/MP      | USA | 2002 |
| DQ907023 | CP/MP      | USA | 2002 |
| DQ907024 | CP/MP      | USA | 2002 |
| DQ907025 | CP/MP      | USA | 2002 |
| DQ907026 | CP/MP      | USA | 2002 |
| DQ907027 | CP/MP      | USA | 2002 |
| DQ907028 | CP/MP      | USA | 2002 |
| DQ907029 | CP/MP      | USA | 2002 |
| DQ907030 | CP/MP      | USA | 2002 |
| DQ907031 | CP/MP      | USA | 2002 |
| DQ907032 | CP/MP      | USA | 2002 |
| DQ907033 | CP/MP      | USA | 2002 |
| DQ907034 | CP/MP      | USA | 2002 |
| DQ907035 | CP/MP      | USA | 2002 |
| DQ907036 | CP/MP      | USA | 2002 |
| DQ907037 | CP/MP      | USA | 2002 |
| DQ907038 | CP/MP      | USA | 2002 |
| DQ907039 | CP/MP      | USA | 2002 |
| DQ907040 | CP/MP      | USA | 2002 |
| DQ907041 | CP/MP      | USA | 2002 |
| DQ907042 | CP/MP      | USA | 2002 |
| DQ907043 | CP/MP      | USA | 2002 |
| DQ907044 | CP/MP      | USA | 2002 |
| DQ907045 | CP/MP      | USA | 2002 |
| DQ907046 | CP/MP      | USA | 2002 |
| DQ907047 | CP/MP      | USA | 2002 |
| DQ907048 | CP/MP      | USA | 2002 |
| DQ907049 | CP/MP      | USA | 2002 |
| DQ907050 | CP/MP      | USA | 2002 |

---

|          |       |     |      |
|----------|-------|-----|------|
| DQ907051 | CP/MP | USA | 2002 |
| DQ907052 | CP/MP | USA | 2002 |
| DQ907053 | CP/MP | USA | 2002 |
| DQ907054 | CP/MP | USA | 2002 |
| DQ907055 | CP/MP | USA | 2002 |
| DQ907056 | CP/MP | USA | 2002 |
| DQ907057 | CP/MP | USA | 2002 |
| DQ907058 | CP/MP | USA | 2002 |
| DQ907059 | CP/MP | USA | 2002 |
| DQ907060 | CP/MP | USA | 2002 |
| DQ907061 | CP/MP | USA | 2002 |
| DQ907062 | CP/MP | USA | 2002 |
| DQ907063 | CP/MP | USA | 2002 |
| DQ907064 | CP/MP | USA | 2002 |
| DQ907065 | CP/MP | USA | 2002 |
| DQ907066 | CP/MP | USA | 2002 |
| DQ907067 | CP/MP | USA | 2002 |
| DQ907068 | CP/MP | USA | 2002 |
| DQ907069 | CP/MP | USA | 2002 |
| DQ907070 | CP/MP | USA | 2002 |
| DQ907071 | CP/MP | USA | 2002 |
| DQ907072 | CP/MP | USA | 2002 |
| DQ907073 | CP/MP | USA | 2002 |
| DQ907074 | CP/MP | USA | 2002 |
| DQ907075 | CP/MP | USA | 2002 |
| DQ907076 | CP/MP | USA | 2002 |
| DQ907077 | CP/MP | USA | 2002 |
| DQ907078 | CP/MP | USA | 2002 |
| DQ907079 | CP/MP | USA | 2002 |
| DQ907080 | CP/MP | USA | 2002 |
| DQ907081 | CP/MP | USA | 2002 |
| DQ907082 | CP/MP | USA | 2002 |
| DQ907083 | CP/MP | USA | 2002 |
| DQ907084 | CP/MP | USA | 2002 |
| DQ907085 | CP/MP | USA | 2002 |
| DQ907086 | CP/MP | USA | 2002 |
| DQ907087 | CP/MP | USA | 2003 |
| DQ907088 | CP/MP | USA | 2003 |
| DQ907089 | CP/MP | USA | 2003 |
| DQ907090 | CP/MP | USA | 2003 |
| DQ907091 | CP/MP | USA | 2003 |
| DQ907092 | CP/MP | USA | 2003 |
| DQ907093 | CP/MP | USA | 2003 |
| DQ907094 | CP/MP | USA | 2003 |
| DQ907095 | CP/MP | USA | 2003 |
| DQ907096 | CP/MP | USA | 2003 |
| DQ907097 | CP/MP | USA | 2003 |
| DQ907098 | CP/MP | USA | 2003 |
| DQ907099 | CP/MP | USA | 2003 |
| DQ907100 | CP/MP | USA | 2003 |

---

---

|          |       |     |      |
|----------|-------|-----|------|
| DQ907101 | CP/MP | USA | 2003 |
| DQ907102 | CP/MP | USA | 2003 |
| DQ907103 | CP/MP | USA | 2003 |
| DQ907104 | CP/MP | USA | 2003 |
| DQ907105 | CP/MP | USA | 2003 |
| DQ907106 | CP/MP | USA | 2003 |
| DQ907107 | CP/MP | USA | 2003 |
| DQ907108 | CP/MP | USA | 2003 |
| DQ907109 | CP/MP | USA | 2003 |
| DQ907110 | CP/MP | USA | 2003 |
| DQ907111 | CP/MP | USA | 2003 |
| DQ907112 | CP/MP | USA | 2003 |
| DQ907113 | CP/MP | USA | 2003 |
| DQ907114 | CP/MP | USA | 2003 |
| DQ907115 | CP/MP | USA | 2003 |
| DQ907116 | CP/MP | USA | 2003 |
| DQ907117 | CP/MP | USA | 2003 |
| DQ907118 | CP/MP | USA | 2003 |
| DQ907119 | CP/MP | USA | 2003 |
| DQ907120 | CP/MP | USA | 2003 |
| DQ907121 | CP/MP | USA | 2003 |
| DQ907122 | CP/MP | USA | 2004 |
| DQ907123 | CP/MP | USA | 2004 |
| DQ907124 | CP/MP | USA | 2004 |
| DQ907125 | CP/MP | USA | 2004 |
| DQ907126 | CP/MP | USA | 2004 |
| DQ907127 | CP/MP | USA | 2004 |
| DQ907128 | CP/MP | USA | 2004 |
| DQ907129 | CP/MP | USA | 2004 |
| DQ907130 | CP/MP | USA | 2004 |
| DQ907131 | CP/MP | USA | 2004 |
| DQ907132 | CP/MP | USA | 2004 |
| DQ907133 | CP/MP | USA | 2004 |
| DQ907134 | CP/MP | USA | 2004 |
| DQ907135 | CP/MP | USA | 2004 |
| DQ907136 | CP/MP | USA | 2004 |
| DQ907137 | CP/MP | USA | 2004 |
| DQ907138 | CP/MP | USA | 2004 |
| DQ907139 | CP/MP | USA | 2004 |
| DQ907140 | CP/MP | USA | 2004 |
| DQ907141 | CP/MP | USA | 2004 |
| DQ907142 | CP/MP | USA | 2004 |
| DQ907143 | CP/MP | USA | 2004 |
| DQ907144 | CP/MP | USA | 2004 |
| DQ907145 | CP/MP | USA | 2004 |
| DQ907146 | CP/MP | USA | 2004 |
| DQ907147 | CP/MP | USA | 2004 |
| DQ907148 | CP/MP | USA | 2004 |
| DQ907149 | CP/MP | USA | 2004 |
| DQ907150 | CP/MP | USA | 2004 |

---



|          |       |             |      |
|----------|-------|-------------|------|
| DQ907151 | CP/MP | USA         | 2004 |
| DQ907152 | CP/MP | USA         | 2004 |
| DQ907153 | CP/MP | USA         | 2004 |
| DQ907154 | CP/MP | USA         | 2004 |
| DQ907155 | CP/MP | USA         | 2004 |
| DQ907156 | CP/MP | USA         | 2004 |
| DQ907157 | CP/MP | USA         | 2004 |
| DQ907158 | CP/MP | USA         | 2004 |
| DQ907159 | CP/MP | USA         | 2004 |
| DQ907160 | CP/MP | USA         | 2004 |
| EF408152 | CP/MP | New Zealand | 2005 |
| EF408153 | CP/MP | New Zealand | 2005 |
| EF408154 | CP/MP | New Zealand | 2005 |
| EF408155 | CP/MP | New Zealand | 2005 |
| EF408156 | CP/MP | New Zealand | 2005 |
| EF408157 | CP/MP | New Zealand | 2005 |
| EF408158 | CP/MP | New Zealand | 2005 |
| EF408159 | CP/MP | New Zealand | 2005 |
| EF408160 | CP/MP | New Zealand | 2005 |
| EF408161 | CP/MP | New Zealand | 2005 |
| EF408162 | CP/MP | New Zealand | 2005 |
| EF408163 | CP/MP | New Zealand | 2005 |
| EF408164 | CP/MP | New Zealand | 2005 |
| EF408165 | CP/MP | New Zealand | 2005 |
| EF408166 | CP/MP | New Zealand | 2005 |
| EF408167 | CP/MP | New Zealand | 2005 |
| EF408168 | CP/MP | New Zealand | 2005 |
| EF408169 | CP/MP | New Zealand | 2005 |
| EF408170 | CP/MP | New Zealand | 2005 |
| EF408171 | CP/MP | New Zealand | 2005 |
| EF408172 | CP/MP | New Zealand | 2005 |
| EF408173 | CP/MP | New Zealand | 2005 |
| EF408174 | CP/MP | New Zealand | 2005 |
| EF408175 | CP/MP | New Zealand | 2005 |
| EF408176 | CP/MP | New Zealand | 2005 |
| EF408177 | CP/MP | New Zealand | 2005 |
| EF408178 | CP/MP | New Zealand | 2005 |
| EF408179 | CP/MP | New Zealand | 2005 |
| EF408180 | CP/MP | New Zealand | 2005 |
| EF408181 | CP/MP | New Zealand | 2005 |
| EF408182 | CP/MP | New Zealand | 2005 |
| EF408183 | CP/MP | New Zealand | 2005 |
| EF408184 | CP/MP | New Zealand | 2005 |
| EF408185 | CP/MP | New Zealand | 2005 |
| EU332307 | GN    | China       | 2006 |
| EU332308 | GN    | China       | 2004 |
| EU332309 | GN    | China       | 2005 |
| EU332310 | GN    | China       | 2005 |
| EU332311 | GN    | China       | 2005 |
| EU332312 | GN    | China       | 2005 |

|                 |              |              |             |
|-----------------|--------------|--------------|-------------|
| <b>EU332313</b> | <b>GN</b>    | <b>China</b> | <b>2005</b> |
| <b>EU332314</b> | <b>GN</b>    | <b>China</b> | <b>2005</b> |
| <b>EU332315</b> | <b>GN</b>    | <b>China</b> | <b>2005</b> |
| <b>EU332316</b> | <b>GN</b>    | <b>China</b> | <b>2005</b> |
| <b>EU332317</b> | <b>GN</b>    | <b>China</b> | <b>2005</b> |
| <b>EU332318</b> | <b>GN</b>    | <b>China</b> | <b>2005</b> |
| <b>EU332319</b> | <b>GN</b>    | <b>China</b> | <b>2005</b> |
| <b>EU332320</b> | <b>GN</b>    | <b>China</b> | <b>2005</b> |
| <b>EU332321</b> | <b>GN</b>    | <b>China</b> | <b>2005</b> |
| <b>EU332322</b> | <b>GN</b>    | <b>China</b> | <b>2005</b> |
| <b>EU332323</b> | <b>GN</b>    | <b>China</b> | <b>2005</b> |
| <b>EU332324</b> | <b>GN</b>    | <b>China</b> | <b>2005</b> |
| <b>EU332325</b> | <b>GN</b>    | <b>China</b> | <b>2005</b> |
| <b>EU332326</b> | <b>GN</b>    | <b>China</b> | <b>2005</b> |
| <b>EU332327</b> | <b>GN</b>    | <b>China</b> | <b>2005</b> |
| <b>EU332328</b> | <b>GN</b>    | <b>China</b> | <b>2006</b> |
| <b>EU332329</b> | <b>GN</b>    | <b>China</b> | <b>2006</b> |
| <b>EU332330</b> | <b>GN</b>    | <b>China</b> | <b>2006</b> |
| <b>EU332331</b> | <b>GN</b>    | <b>China</b> | <b>2006</b> |
| <b>EU332332</b> | <b>GN</b>    | <b>China</b> | <b>2006</b> |
| <b>EU332333</b> | <b>GN</b>    | <b>China</b> | <b>2006</b> |
| <b>EU332334</b> | <b>GN</b>    | <b>China</b> | <b>2006</b> |
| <b>EU332335</b> | <b>GN</b>    | <b>China</b> | <b>2006</b> |
| <b>EU332336</b> | <b>GN</b>    | <b>China</b> | <b>2006</b> |
| <b>EU386773</b> | <b>CP/MP</b> | <b>China</b> | <b>2006</b> |
| <b>EU386774</b> | <b>CP/MP</b> | <b>China</b> | <b>2005</b> |
| <b>EU386775</b> | <b>CP/MP</b> | <b>China</b> | <b>2006</b> |
| <b>EU386776</b> | <b>CP/MP</b> | <b>China</b> | <b>2004</b> |
| <b>EU386777</b> | <b>CP/MP</b> | <b>China</b> | <b>2004</b> |
| <b>EU386778</b> | <b>CP/MP</b> | <b>China</b> | <b>2004</b> |
| <b>EU386779</b> | <b>CP/MP</b> | <b>China</b> | <b>2004</b> |
| <b>EU386780</b> | <b>CP/MP</b> | <b>China</b> | <b>2004</b> |
| <b>EU386781</b> | <b>CP/MP</b> | <b>China</b> | <b>2005</b> |
| <b>EU386782</b> | <b>CP/MP</b> | <b>China</b> | <b>2005</b> |
| <b>EU386783</b> | <b>CP/MP</b> | <b>China</b> | <b>2004</b> |
| <b>EU386784</b> | <b>CP/MP</b> | <b>China</b> | <b>2004</b> |
| <b>EU386785</b> | <b>CP/MP</b> | <b>China</b> | <b>2005</b> |
| <b>EU386786</b> | <b>CP/MP</b> | <b>China</b> | <b>2005</b> |
| <b>EU386787</b> | <b>CP/MP</b> | <b>China</b> | <b>2004</b> |
| <b>EU386788</b> | <b>CP/MP</b> | <b>China</b> | <b>2004</b> |
| <b>EU386789</b> | <b>CP/MP</b> | <b>China</b> | <b>2005</b> |
| <b>EU386790</b> | <b>CP/MP</b> | <b>China</b> | <b>2005</b> |
| <b>EU386791</b> | <b>CP/MP</b> | <b>China</b> | <b>2005</b> |
| <b>EU386792</b> | <b>CP/MP</b> | <b>China</b> | <b>2005</b> |
| <b>EU386793</b> | <b>CP/MP</b> | <b>China</b> | <b>2004</b> |
| <b>EU386794</b> | <b>CP/MP</b> | <b>China</b> | <b>2004</b> |
| <b>EU386795</b> | <b>CP/MP</b> | <b>China</b> | <b>2005</b> |
| <b>EU386796</b> | <b>CP/MP</b> | <b>China</b> | <b>2004</b> |
| <b>EU386797</b> | <b>CP/MP</b> | <b>China</b> | <b>2004</b> |
| <b>EU386798</b> | <b>CP/MP</b> | <b>China</b> | <b>2004</b> |

|                 |       |                |       |
|-----------------|-------|----------------|-------|
| <b>EU386799</b> | CP/MP | China          | 2004  |
| <b>EU386800</b> | CP/MP | China          | 2005  |
| <b>EU386801</b> | CP/MP | China          | 2005  |
| <b>EU386802</b> | CP/MP | China          | 2006  |
| <b>EU386803</b> | CP/MP | China          | 2004  |
| <b>EU386804</b> | CP/MP | China          | 2004  |
| <b>EU386805</b> | CP/MP | China          | 2004  |
| <b>EU386806</b> | CP/MP | China          | 2005  |
| <b>EU386807</b> | CP/MP | China          | 2006  |
| <b>EU386808</b> | CP/MP | China          | 2004  |
| <b>EU386809</b> | CP/MP | China          | 2005  |
| <b>EU386810</b> | CP/MP | China          | 2005  |
| <b>EU386811</b> | CP/MP | China          | 2006  |
| <b>EU386812</b> | CP/MP | China          | 2005  |
| <b>EU386813</b> | CP/MP | China          | 2005  |
| <b>EU386814</b> | CP/MP | China          | 2006  |
| <b>EU386815</b> | CP/MP | China          | 2006  |
| <b>EU402386</b> | GN    | China          | 2005  |
| <b>EU402387</b> | GN    | China          | 2004  |
| <b>EU402388</b> | GN    | China          | 2005  |
| <b>EU402389</b> | GN    | China          | 2005  |
| <b>EU402390</b> | GN    | China          | 2005  |
| <b>EU402391</b> | GN    | China          | 2005  |
| <b>EU863652</b> | CP/MP | Czech Republic | 2007  |
| <b>EU863653</b> | CP/MP | Czech Republic | 2008  |
| <b>Z14123</b>   | CP/MP | USA            | 1990s |

\*Gene sequences used in this study (GN = Full-length genome; P0 = P0 protein gene; RdRp = RNA-dependent RNA polymerase gene; CP = Coat protein gene; MP = Movement protein gene; RTD = Read-through domain gene).

SUPPLEMENTARY TABLE 2. Summary of sequence data, country of origin, and date of isolation of *Soybean dwarf virus* isolates.

| <b>Accession N°</b> | <b>Gene*</b> | <b>Isolate origin</b> | <b>Date</b> |
|---------------------|--------------|-----------------------|-------------|
| <b>AB038148</b>     | GN           | Japan                 | 1994        |
| <b>AB038149</b>     | GN           | Japan                 | 1997        |
| <b>AB038150</b>     | GN           | Japan                 | 1996        |
| <b>AB076038</b>     | GN           | Japan                 | 1999        |
| <b>AB076039</b>     | CP/MP/RTD    | Japan                 | 1995        |
| <b>AB076040</b>     | CP/MP/RTD    | Japan                 | 1994        |
| <b>AB076041</b>     | CP/MP/RTD    | Japan                 | 2000        |
| <b>AB076042</b>     | CP/MP/RTD    | Japan                 | 2000        |
| <b>AB076043</b>     | CP/MP/RTD    | Japan                 | 2000        |
| <b>AB076044</b>     | CP/MP/RTD    | Japan                 | 2000        |
| <b>AB076045</b>     | CP/MP/RTD    | Japan                 | 2000        |
| <b>AB076046</b>     | CP/MP/RTD    | Japan                 | 2000        |
| <b>AB076047</b>     | CP/MP/RTD    | Japan                 | 1999        |
| <b>AB076048</b>     | CP/MP/RTD    | Japan                 | 1999        |
| <b>AB076049</b>     | CP/MP/RTD    | Japan                 | 1999        |
| <b>AB076050</b>     | CP/MP/RTD    | Japan                 | 1999        |
| <b>BD072843</b>     | RdRp         | Japan                 | 1990s       |
| <b>BD072844</b>     | RdRp         | Japan                 | 1990s       |
| <b>BD072845</b>     | RdRp         | Japan                 | 1990s       |
| <b>BD072846</b>     | RdRp         | Japan                 | 1990s       |
| <b>BD072847</b>     | RdRp         | Japan                 | 1990s       |
| <b>BD072848</b>     | RdRp         | Japan                 | 1990s       |
| <b>BD072849</b>     | RdRp         | Japan                 | 1990s       |
| <b>BD072850</b>     | RdRp         | Japan                 | 1990s       |
| <b>DQ145545</b>     | GN           | USA                   | 2003        |
| <b>EF466131</b>     | CP/MP        | Germany               | 2006        |
| <b>EF466132</b>     | CP/MP        | Germany               | 2003        |
| <b>EF466133</b>     | CP/MP        | Germany               | 2006        |
| <b>EF466134</b>     | CP/MP        | Germany               | 2003        |
| <b>EU095846</b>     | CP/MP/RTD    | USA                   | 2006        |
| <b>EU095847</b>     | CP/MP/RTD    | USA                   | 2006        |
| <b>EU419570</b>     | CP/MP/RTD    | USA                   | 2004        |
| <b>EU419571</b>     | CP/MP/RTD    | USA                   | 2004        |
| <b>EU419572</b>     | CP/MP/RTD    | USA                   | 2004        |
| <b>EU419573</b>     | CP/MP/RTD    | USA                   | 2003        |
| <b>EU419574</b>     | CP/MP/RTD    | USA                   | 2003        |
| <b>EU419575</b>     | CP/MP/RTD    | USA                   | 2005        |
| <b>EU419576</b>     | CP/MP/RTD    | USA                   | 2005        |
| <b>EU419577</b>     | CP/MP/RTD    | USA                   | 2005        |
| <b>EU419578</b>     | CP/MP/RTD    | USA                   | 2005        |
| <b>EU419579</b>     | CP/MP/RTD    | USA                   | 2005        |
| <b>EU419580</b>     | CP/MP/RTD    | USA                   | 2004        |
| <b>EU419581</b>     | CP/MP/RTD    | USA                   | 2006        |
| <b>EU419582</b>     | CP/MP/RTD    | USA                   | 2006        |
| <b>EU419583</b>     | CP/MP/RTD    | USA                   | 2007        |
| <b>EU419584</b>     | CP/MP/RTD    | USA                   | 2007        |

|                 |       |     |      |
|-----------------|-------|-----|------|
| <b>FJ390401</b> | CP/MP | USA | 2007 |
| <b>FJ390402</b> | CP/MP | USA | 2007 |
| <b>FJ390403</b> | CP/MP | USA | 2007 |
| <b>FJ390404</b> | CP/MP | USA | 2007 |
| <b>FJ390405</b> | CP/MP | USA | 2007 |
| <b>FJ390406</b> | CP/MP | USA | 2007 |

\*Gene sequences used in this study (GN = Full-length genome; P0 = P0 protein gene; RdRp = RNA-dependent RNA polymerase gene; CP = Coat protein gene; MP = Movement protein gene; RTD = Read-through domain gene).

SUPPLEMENTARY TABLE 3. Summary of sequence data, country of origin, and date of isolation of *Beet chlorosis virus* isolates.

| Accession N° | Gene*      | Isolate origin | Date |
|--------------|------------|----------------|------|
| AF167483     | CP/MP      | USA            | 1997 |
| AF167485     | CP/MP      | USA            | 1996 |
| AF168607     | P0/RdRp    | USA            | 1997 |
| AF168609     | P0/RdRp    | USA            | 1996 |
| AF352025     | GN         | USA            | 1996 |
| EF659974     | P0/RdRp    | Poland         | 2005 |
| EF659975     | CP/MP      | Poland         | 2005 |
| EU022464     | P0/RdRp    | France         | 2005 |
| EU022465     | P0/RdRp    | France         | 2005 |
| EU022466     | P0/RdRp    | France         | 2005 |
| EU022467     | P0/RdRp    | France         | 2005 |
| EU022468     | P0/RdRp    | France         | 2005 |
| EU022469     | P0/RdRp    | France         | 2005 |
| EU022470     | P0/RdRp    | France         | 2005 |
| EU022471     | P0/RdRp    | France         | 2005 |
| EU022472     | P0/RdRp    | France         | 2005 |
| EU022477     | P0/RdRp    | France         | 2005 |
| EU022490     | CP/MP      | France         | 2005 |
| EU022491     | CP/MP      | France         | 2005 |
| EU022492     | CP/MP      | France         | 2005 |
| EU022493     | CP/MP      | France         | 2005 |
| EU022494     | CP/MP      | France         | 2005 |
| EU022495     | CP/MP      | France         | 2005 |
| EU022509     | CP/MP/RTD  | Poland         | 2005 |
| EU022510     | CP/MP/RTD  | France         | 2005 |
| EU022511     | CP/MP/RTD  | France         | 2005 |
| L39952       | RdRp/CP/MP | Great Britain  | 1989 |
| L39983       | RdRp/CP/MP | Iran           | 1985 |
| L39984       | RdRp/CP/MP | Iran           | 1985 |
| L39985       | RdRp/CP/MP | Iran           | 1985 |
| L40018       | RdRp/CP/MP | Iran           | 1985 |
| L40019       | RdRp/CP/MP | Italy          | 1988 |
| L40020       | RdRp/CP/MP | Italy          | 1988 |
| NC_002766    | GN         | Great Britain  | 1997 |

\*Gene sequences used in this study (GN = Full-length genome; P0 = P0 protein gene; RdRp = RNA-dependent RNA polymerase gene; CP = Coat protein gene; MP = Movement protein gene; RTD = Read-through domain gene).

SUPPLEMENTARY TABLE 4. Summary of sequence data, country of origin, and date of isolation of *Beet mild yellowing virus* isolates.

| <b>Accession N°</b> | <b>Gene*</b> | <b>Isolate origin</b> | <b>Date</b> |
|---------------------|--------------|-----------------------|-------------|
| AF167474            | CP/MP        | Great Britain         | 1997        |
| AF167479            | CP/MP        | Iran                  | 1992        |
| AF167480            | CP/MP        | France                | 1990        |
| AF167481            | CP/MP        | France                | 1981        |
| AF167482            | CP/MP        | Great Britain         | 1996        |
| AF168598            | P0/RdRp      | Great Britain         | 1997        |
| AF168599            | P0/RdRp      | Great Britain         | 1996        |
| AF168602            | P0/RdRp      | Iran                  | 1992        |
| AF168603            | P0/RdRp      | France                | 1990        |
| AF168604            | P0/RdRp      | France                | 1981        |
| EF107543            | GN           | Great Britain         | 1998        |
| EU022473            | P0/RdRp      | Unknown               | 2005        |
| EU022474            | P0/RdRp      | France                | 2005        |
| EU022475            | P0/RdRp      | France                | 2005        |
| EU022476            | P0/RdRp      | France                | 2005        |
| EU022478            | P0/RdRp      | France                | 2005        |
| EU022479            | P0/RdRp      | Poland                | 2005        |
| EU022480            | P0/RdRp      | France                | 2005        |
| EU022481            | P0/RdRp      | France                | 2005        |
| EU022482            | P0/RdRp      | France                | 2005        |
| EU022483            | P0/RdRp      | Poland                | 2005        |
| EU022484            | P0/RdRp      | Poland                | 2005        |
| EU022485            | P0/RdRp      | Poland                | 2005        |
| EU022486            | P0/RdRp      | Poland                | 2005        |
| EU022487            | P0/RdRp      | Poland                | 2005        |
| EU022488            | P0/RdRp      | Poland                | 2005        |
| EU022496            | CP/MP        | France                | 2005        |
| EU022497            | CP/MP        | France                | 2005        |
| EU022498            | CP/MP        | France                | 2005        |
| EU022499            | CP/MP        | France                | 2005        |
| EU022500            | CP/MP        | France                | 2005        |
| EU022501            | CP/MP        | France                | 2005        |
| EU022502            | CP/MP        | France                | 2005        |
| EU022503            | CP/MP        | Poland                | 2005        |
| EU022504            | CP/MP        | Poland                | 2005        |
| EU022505            | CP/MP        | Poland                | 2005        |
| EU022506            | CP/MP        | Poland                | 2005        |
| EU022507            | CP/MP        | Poland                | 2005        |
| EU148508            | CP/MP/RTD    | Poland                | 2005        |
| EU148509            | CP/MP/RTD    | France                | 2005        |
| EU148510            | CP/MP/RTD    | France                | 2005        |
| NC_003491           | GN           | France                | 1980        |
| Y16864              | P0/RdRp      | Germany               | 1990s       |
| Y16865              | P0/RdRp      | USA                   | 1990s       |
| Y16866              | P0/RdRp      | Czech Republic        | 1990s       |

\*Gene sequences used in this study (GN = Full-length genome; P0 = P0 protein gene; RdRp = RNA-dependent RNA polymerase gene; CP = Coat protein gene; MP = Movement protein gene; RTD = Read-through domain gene).



SUPPLEMENTARY TABLE 5. Summary of sequence data, country of origin, and date of isolation of *Cucurbit aphid-borne yellowing virus* isolates.

| <b>Accession N°</b> | <b>Gene*</b> | <b>Isolate origin</b> | <b>Date</b> |
|---------------------|--------------|-----------------------|-------------|
| AY529653            | CP/MP        | Spain                 | 2003        |
| AY529654            | CP/MP        | Spain                 | 2003        |
| DQ973123            | RdRp/CP/MP   | China                 | 2006        |
| DQ973124            | RdRp/CP/MP   | China                 | 2006        |
| EF029112            | CP/MP        | Italy                 | 2006        |
| EF029113            | CP/MP        | Italy                 | 2006        |
| EF029114            | CP/MP        | Italy                 | 2006        |
| EF029115            | CP/MP        | Italy                 | 2006        |
| EF063704            | RdRp/CP/MP   | China                 | 2006        |
| EF063705            | RdRp/CP/MP   | China                 | 2006        |
| EF063706            | RdRp/CP/MP   | China                 | 2006        |
| EF063707            | RdRp/CP/MP   | China                 | 2006        |
| EF063708            | RdRp/CP/MP   | China                 | 2006        |
| EF187338            | CP/MP        | Tunisia               | 2003-2004   |
| EF187339            | CP/MP        | Tunisia               | 2003-2004   |
| EF187340            | CP/MP        | Tunisia               | 2003-2004   |
| EF187341            | CP/MP        | Tunisia               | 2003-2004   |
| EF187342            | CP/MP        | Tunisia               | 2003-2004   |
| EF187343            | CP/MP        | Tunisia               | 2003-2004   |
| EF187344            | CP/MP        | Tunisia               | 2003-2004   |
| EF187345            | CP/MP        | Tunisia               | 2003-2004   |
| EF187346            | CP/MP        | Tunisia               | 2003-2004   |
| EF488996            | RdRp/CP/MP   | China                 | 2006        |
| EF488997            | RdRp/CP/MP   | China                 | 2006        |
| EU000535            | GN           | China                 | 2006        |
| EU030629            | CP/MP        | Taiwan                | 2007        |
| EU091148            | RdRp/CP/MP   | China                 | 2006        |
| EU091149            | RdRp/CP/MP   | China                 | 2006        |
| EU091150            | RdRp/CP/MP   | China                 | 2006        |
| EU091151            | RdRp/CP/MP   | China                 | 2006        |
| EU244315            | RdRp/CP/MP   | China                 | 2007        |
| EU244316            | RdRp/CP/MP   | China                 | 2007        |
| EU244317            | RdRp/CP/MP   | China                 | 2007        |
| EU244318            | RdRp/CP/MP   | China                 | 2007        |
| EU244319            | RdRp/CP/MP   | China                 | 2007        |
| EU244320            | RdRp/CP/MP   | China                 | 2007        |
| EU244321            | RdRp/CP/MP   | China                 | 2007        |
| EU244322            | RdRp/CP/MP   | China                 | 2007        |
| EU244323            | RdRp/CP/MP   | China                 | 2007        |
| EU244324            | RdRp/CP/MP   | China                 | 2007        |
| EU244325            | RdRp/CP/MP   | China                 | 2007        |
| EU244326            | RdRp/CP/MP   | China                 | 2007        |
| EU244327            | RdRp/CP/MP   | China                 | 2007        |
| FJ428797            | CP/MP        | Slovakia              | 2008        |
| FJ428798            | CP/MP        | Iran                  | 2005-2007   |
| FJ428799            | CP/MP        | Iran                  | 2005-2007   |

---

|          |       |      |           |
|----------|-------|------|-----------|
| FJ428800 | CP/MP | Iran | 2005-2007 |
|----------|-------|------|-----------|

---

\*Gene sequences used in this study (GN = Full-length genome; P0 = P0 protein gene; RdRp = RNA-dependent RNA polymerase gene; CP = Coat protein gene; Movement protein gene; RTD = Read-through domain gene).

SUPPLEMENTARY TABLE 6. Summary of sequence data, country of origin, and date of isolation of *Cereal yellow dwarf virus* isolates.

| <b>Accession N°</b> | <b>Gene*</b> | <b>Isolate origin</b> | <b>Date</b> |
|---------------------|--------------|-----------------------|-------------|
| AF235168            | GN           | Mexico                | 2000s       |
| AY450425            | CP/MP/RTD    | Iran                  | 2001        |
| DQ115527            | CP/MP        | USA                   | 1990s       |
| DQ115529            | CP/MP        | USA                   | 1990s       |
| DQ115534            | CP/MP        | USA                   | 1925        |
| DQ631858            | CP/MP        | USA                   | 2003        |
| DQ631859            | CP/MP        | USA                   | 2002        |
| DQ631860            | CP/MP        | USA                   | 2002        |
| DQ631861            | CP/MP        | USA                   | 2002        |
| DQ910730            | CP/MP        | USA                   | 2002        |
| DQ910731            | CP/MP        | USA                   | 2002        |
| DQ910732            | CP/MP        | USA                   | 2002        |
| DQ910733            | CP/MP        | USA                   | 2002        |
| DQ910734            | CP/MP        | USA                   | 2002        |
| DQ910735            | CP/MP        | USA                   | 2002        |
| DQ910736            | CP/MP        | USA                   | 2002        |
| DQ910737            | CP/MP        | USA                   | 2002        |
| DQ910738            | CP/MP        | USA                   | 2002        |
| DQ910739            | CP/MP        | USA                   | 2002        |
| DQ910740            | CP/MP        | USA                   | 2003        |
| DQ910741            | CP/MP        | USA                   | 2003        |
| DQ910742            | CP/MP        | USA                   | 2003        |
| DQ910743            | CP/MP        | USA                   | 2003        |
| DQ910744            | CP/MP        | USA                   | 2003        |
| DQ910745            | CP/MP        | USA                   | 2003        |
| DQ910746            | CP/MP        | USA                   | 2003        |
| DQ910747            | CP/MP        | USA                   | 2003        |
| DQ910748            | CP/MP        | USA                   | 2003        |
| DQ910749            | CP/MP        | USA                   | 2003        |
| DQ910750            | CP/MP        | USA                   | 2003        |
| DQ910751            | CP/MP        | USA                   | 2003        |
| DQ910752            | CP/MP        | USA                   | 2003        |
| DQ910753            | CP/MP        | USA                   | 2003        |
| DQ910754            | CP/MP        | USA                   | 2003        |
| DQ910755            | CP/MP        | USA                   | 2004        |
| DQ910756            | CP/MP        | USA                   | 2004        |
| DQ910757            | CP/MP        | USA                   | 2004        |
| DQ910758            | CP/MP        | USA                   | 2004        |
| DQ910759            | CP/MP        | USA                   | 2004        |
| DQ910760            | CP/MP        | USA                   | 2004        |
| DQ910761            | CP/MP        | USA                   | 2004        |
| DQ988082            | RdRp/CP/MP   | USA                   | 2002        |
| DQ988083            | RdRp/CP/MP   | USA                   | 2002        |
| DQ988084            | RdRp/CP/MP   | USA                   | 2002        |
| DQ988085            | RdRp/CP/MP   | USA                   | 2002        |

|                  |            |             |       |
|------------------|------------|-------------|-------|
| <b>DQ988086</b>  | RdRp/CP/MP | USA         | 2002  |
| <b>DQ988087</b>  | RdRp/CP/MP | USA         | 2002  |
| <b>DQ988088</b>  | RdRp/CP/MP | USA         | 2002  |
| <b>DQ988089</b>  | RdRp/CP/MP | USA         | 2003  |
| <b>DQ988090</b>  | RdRp/CP/MP | USA         | 2003  |
| <b>DQ988091</b>  | RdRp/CP/MP | USA         | 2003  |
| <b>DQ988092</b>  | RdRp/CP/MP | USA         | 2003  |
| <b>DQ988093</b>  | RdRp/CP/MP | USA         | 2003  |
| <b>DQ988094</b>  | RdRp/CP/MP | USA         | 2003  |
| <b>DQ988095</b>  | RdRp/CP/MP | USA         | 2003  |
| <b>DQ988096</b>  | RdRp/CP/MP | USA         | 2003  |
| <b>DQ988097</b>  | RdRp/CP/MP | USA         | 2003  |
| <b>DQ988098</b>  | RdRp/CP/MP | USA         | 2003  |
| <b>DQ988099</b>  | RdRp/CP/MP | USA         | 2003  |
| <b>DQ988100</b>  | RdRp/CP/MP | USA         | 2003  |
| <b>DQ988101</b>  | RdRp/CP/MP | USA         | 2003  |
| <b>DQ988102</b>  | RdRp/CP/MP | USA         | 2004  |
| <b>DQ988103</b>  | RdRp/CP/MP | USA         | 2004  |
| <b>DQ988104</b>  | RdRp/CP/MP | USA         | 2004  |
| <b>DQ988105</b>  | RdRp/CP/MP | USA         | 2004  |
| <b>DQ988106</b>  | RdRp/CP/MP | USA         | 2004  |
| <b>DQ988107</b>  | RdRp/CP/MP | USA         | 2004  |
| <b>DQ988108</b>  | RdRp/CP/MP | USA         | 2004  |
| <b>EF372272</b>  | CP/MP/RTD  | Turkey      | 2006  |
| <b>EF408186</b>  | CP/MP      | New Zealand | 2005  |
| <b>EF408187</b>  | CP/MP      | New Zealand | 2005  |
| <b>EF408188</b>  | CP/MP      | New Zealand | 2005  |
| <b>EF521827</b>  | GN         | USA         | 2000s |
| <b>EF521830</b>  | GN         | USA         | 2000s |
| <b>EF521839</b>  | GN         | USA         | 2000s |
| <b>EF521848</b>  | GN         | USA         | 2000s |
| <b>NC_004751</b> | RTD        | USA         | 1960s |

\*Gene sequences used in this study (GN = Full-length genome; P0 = P0 protein gene; RdRp = RNA-dependent RNA polymerase gene; CP = Coat protein gene; Movement protein genes; RTD = Read-through domain gene).

SUPPLEMENTARY TABLE 7. Summary of sequence data, country of origin, and date of isolation of *Potato leafroll virus* isolates.

| <b>Accession N°</b> | <b>Gene*</b> | <b>Isolate origin</b> | <b>Date</b> |
|---------------------|--------------|-----------------------|-------------|
| AF220151            | RdRp         | Argentina             | 1990s       |
| AF453388            | GN           | Zimbabwe              | 1985        |
| AF453389            | GN           | Spain                 | 1986        |
| AF453390            | GN           | France                | 1996        |
| AF453391            | GN           | France                | 1983        |
| AF453392            | GN           | Peru                  | 1974        |
| AF453393            | GN           | Cuba                  | 1987        |
| AF453394            | GN           | France                | 1985        |
| AF453395            | P0/RdRp      | Australia             | 2000        |
| AF453396            | P0/RdRp      | Australia             | 1981        |
| AF453397            | P0/RdRp      | Australia             | 1987        |
| AF453398            | P0/RdRp      | Australia             | 1992        |
| AF453399            | P0/RdRp      | Spain                 | 1986        |
| AF453400            | P0/RdRp      | Poland                | 1985        |
| AF453401            | P0/RdRp      | Poland                | 2000        |
| AF453403            | P0/RdRp      | Poland                | 1985        |
| AF453404            | P0/RdRp      | Poland                | 1985        |
| AF453405            | P0/RdRp      | France                | 1985        |
| AF453406            | P0/RdRp      | Brazil                | 2000        |
| AF454283            | P0/RdRp      | Poland                | 2000        |
| AY138970            | GN           | Egypt                 | 2000-2005   |
| AY307123            | CP/MP        | Pakistan              | 2005-2006   |
| AY645677            | P0/RdRp      | Tunisia               | 2002        |
| AY645678            | P0/RdRp      | Tunisia               | 2002        |
| AY645679            | P0/RdRp      | Tunisia               | 2002        |
| AY645680            | P0/RdRp      | Tunisia               | 2002        |
| AY645681            | P0/RdRp      | Tunisia               | 2002        |
| AY645682            | P0/RdRp      | Tunisia               | 2002        |
| AY645683            | P0/RdRp      | Tunisia               | 2002        |
| AY645684            | P0/RdRp      | Tunisia               | 2002        |
| AY645685            | P0/RdRp      | Tunisia               | 2002        |
| DQ309064            | CP/MP        | China                 | 2000-2005   |
| DQ315385            | CP/MP        | China                 | 2000-2005   |
| EF063711            | CP/MP        | China                 | 2000-2006   |
| EF654113            | CP/MP        | China                 | 2000s       |
| EU073861            | CP/MP        | Jordan                | 2007        |
| EU073862            | CP/MP        | Jordan                | 2007        |
| EU313202            | GN           | Czech Republic        | 2007        |
| EU717545            | GN           | Czech Republic        | 2007        |
| EU717546            | GN           | Czech Republic        | 2007        |
| EU780084            | CP/MP        | China                 | 2008        |
| FJ481107            | CP/MP        | Iran                  | 2005        |
| FJ481108            | CP/MP        | Iran                  | 2005        |
| FJ481109            | CP/MP        | Iran                  | 2005        |
| FJ481110            | P0/RdRp      | Iran                  | 2005        |
| FJ648776            | CP/MP        | Ukraine               | 2008        |

|           |           |             |       |
|-----------|-----------|-------------|-------|
| NC_001747 | GN        | Scotland    | 1980s |
| U73777    | CP/MP     | South Korea | 1990s |
| X74789    | GN        | Poland      | 1990s |
| X77322    | CP/MP/RTD | Unknown     | 1980s |
| X77323    | CP/MP/RTD | Unknown     | 1980s |
| X77324    | CP/MP/RTD | Unknown     | 1980s |
| X77325    | CP/MP/RTD | Unknown     | 1980s |
| X77326    | CP/MP/RTD | Unknown     | 1980s |

\*Gene sequences used in this study (GN = Full-length genome; P0 = P0 protein gene; RdRp = RNA-dependent RNA polymerase gene; CP = Coat protein gene; MP = Movement protein gene; RTD = Read-through domain gene).

SUPPLEMENTARY TABLE 8. Summary of sequence data, country of origin, and date of isolation of *Sugarcane yellow leaf virus* isolates.

| Accession N° | Gene    | Isolate origin   | Date  |
|--------------|---------|------------------|-------|
| AJ491110     | P0/RdRp | Australia        | 1990s |
| AJ491111     | P0/RdRp | Australia        | 1990s |
| AJ491112     | P0/RdRp | Brazil           | 1990s |
| AJ491113     | P0/RdRp | Brazil           | 1990s |
| AJ491114     | P0/RdRp | USA              | 1990s |
| AJ491115     | P0/RdRp | USA              | 1990s |
| AJ491116     | P0/RdRp | USA              | 1990s |
| AJ491117     | P0/RdRp | USA              | 1990s |
| AJ491118     | P0/RdRp | USA              | 1989  |
| AJ491119     | P0/RdRp | USA              | 1989  |
| AJ491120     | P0/RdRp | USA              | 1989  |
| AJ491121     | P0/RdRp | Mauritius Island | 1990s |
| AJ491122     | P0/RdRp | Mauritius Island | 1990s |
| AJ491123     | P0/RdRp | Mauritius Island | 1990s |
| AJ491126     | P0/RdRp | South Africa     | 1990s |
| AJ491129     | P0/RdRp | Australia        | 1990s |
| AJ491130     | P0/RdRp | USA              | 1990s |
| AJ491131     | P0/RdRp | USA              | 1990s |
| AJ491132     | RdRp    | Australia        | 1990s |
| AJ491133     | RdRp    | Australia        | 1990s |
| AJ491134     | CP/MP   | Brazil           | 1990s |
| AJ491135     | CP/MP   | Brazil           | 1990s |
| AJ491136     | RdRp    | USA              | 1990s |
| AJ491137     | RdRp    | USA              | 1990s |
| AJ491138     | RdRp    | USA              | 1989  |
| AJ491139     | RdRp    | USA              | 1989  |
| AJ491140     | RdRp    | Mauritius Island | 1990s |
| AJ491143     | RdRp    | South Africa     | 1990s |
| AJ491146     | RdRp    | Australia        | 1990s |
| AJ491147     | RdRp    | USA              | 1990s |
| AJ491255     | CP/MP   | Australia        | 1990s |
| AJ491256     | CP/MP   | Australia        | 1990s |
| AJ491257     | CP/MP   | Brazil           | 1990s |
| AJ491258     | CP/MP   | Brazil           | 1990s |
| AJ491259     | CP/MP   | USA              | 1990s |
| AJ491260     | CP/MP   | USA              | 1990s |
| AJ491261     | CP/MP   | USA              | 1989  |
| AJ491262     | CP/MP   | USA              | 1989  |
| AJ491263     | CP/MP   | Mauritius Island | 1990s |
| AJ491264     | CP/MP   | Mauritius Island | 1990s |
| AJ491267     | CP/MP   | South Africa     | 1990s |
| AJ491270     | CP/MP   | Australia        | 1990s |
| AJ491271     | CP/MP   | USA              | 1990s |
| AJ491272     | RTD     | Australia        | 1990s |
| AJ491273     | RTD     | Australia        | 1990s |
| AJ491274     | RTD     | Brazil           | 1990s |

|          |         |                  |           |
|----------|---------|------------------|-----------|
| AJ491275 | RTD     | Brazil           | 1990s     |
| AJ491276 | RTD     | USA              | 1990s     |
| AJ491277 | RTD     | USA              | 1990s     |
| AJ491278 | RTD     | USA              | 1989      |
| AJ491279 | RTD     | USA              | 1989      |
| AJ491280 | RTD     | Mauritius Island | 1990s     |
| AJ491281 | RTD     | Mauritius Island | 1990s     |
| AJ491284 | RTD     | South Africa     | 1990s     |
| AJ491287 | RTD     | Australia        | 1990s     |
| AJ491288 | RTD     | USA              | 1990s     |
| AJ582759 | CP/MP   | Reunion Island   | 1999-2000 |
| AJ582760 | CP/MP   | Reunion Island   | 1999-2000 |
| AJ582761 | CP/MP   | Philippines      | 1999-2000 |
| AJ582762 | CP/MP   | Reunion Island   | 1999-2000 |
| AJ582763 | CP/MP   | Reunion Island   | 1999-2000 |
| AJ582764 | CP/MP   | Mauritius Island | 1999-2000 |
| AJ582765 | CP/MP   | Reunion Island   | 1999-2000 |
| AJ582766 | CP/MP   | Malaysia         | 1999-2000 |
| AJ582767 | CP/MP   | Peru             | 1999-2000 |
| AJ582768 | CP/MP   | Senegal          | 1999-2000 |
| AJ582769 | CP/MP   | Reunion Island   | 1999-2000 |
| AJ582770 | CP/MP   | Cuba             | 1999-2000 |
| AJ582771 | CP/MP   | Reunion Island   | 1999-2000 |
| AJ582772 | CP/MP   | Brazil           | 1999-2000 |
| AJ582773 | CP/MP   | Reunion Island   | 1999-2000 |
| AJ582774 | CP/MP   | Reunion Island   | 1999-2000 |
| AJ582775 | CP/MP   | Reunion Island   | 1999-2000 |
| AJ582776 | CP/MP   | Reunion Island   | 1999-2000 |
| AJ582777 | CP/MP   | China            | 1999-2000 |
| AJ582778 | CP/MP   | Colombia         | 1999-2000 |
| AJ582779 | CP/MP   | Brazil           | 1999-2000 |
| AJ582780 | CP/MP   | USA              | 1999-2000 |
| AJ582781 | CP/MP   | Reunion Island   | 1999-2000 |
| AJ582782 | CP/MP   | Reunion Island   | 1999-2000 |
| AJ582783 | RTD     | Reunion Island   | 1999-2000 |
| AJ582784 | RTD     | Reunion Island   | 1999-2000 |
| AJ582785 | RTD     | Reunion Island   | 1999-2000 |
| AJ582786 | RTD     | Reunion Island   | 1999-2000 |
| AJ582787 | RTD     | Reunion Island   | 1999-2000 |
| AJ582788 | RTD     | Reunion Island   | 1999-2000 |
| AJ582789 | RTD     | Colombia         | 1999-2000 |
| AJ582790 | RTD     | Brazil           | 1999-2000 |
| AJ582791 | RTD     | Reunion Island   | 1999-2000 |
| AJ582792 | RTD     | Reunion Island   | 1999-2000 |
| AJ606084 | P0/RdRp | Malaysia         | 1999-2000 |
| AJ606085 | P0/RdRp | Mauritius Island | 1999-2000 |
| AJ606086 | P0/RdRp | Brazil           | 1999-2000 |
| AJ606087 | P0/RdRp | Reunion Island   | 1999-2000 |
| AJ606088 | P0/RdRp | Reunion Island   | 1999-2000 |
| AJ606089 | P0/RdRp | Reunion Island   | 1999-2000 |



|                 |         |                |           |
|-----------------|---------|----------------|-----------|
| <b>AJ606090</b> | P0/RdRp | Reunion Island | 1999-2000 |
| <b>AJ606091</b> | P0/RdRp | Reunion Island | 1999-2000 |
| <b>AJ606092</b> | P0/RdRp | Reunion Island | 1999-2000 |
| <b>AJ621159</b> | P0/RdRp | Reunion Island | 1999-2000 |
| <b>AJ621160</b> | P0/RdRp | Reunion Island | 1999-2000 |
| <b>AJ621161</b> | P0/RdRp | Reunion Island | 1999-2000 |
| <b>AJ621162</b> | P0/RdRp | USA            | 1999-2000 |
| <b>AJ621163</b> | P0/RdRp | Reunion Island | 1999-2000 |
| <b>AJ621164</b> | P0/RdRp | Reunion Island | 1999-2000 |
| <b>AJ621165</b> | P0/RdRp | Reunion Island | 1999-2000 |
| <b>AJ621166</b> | P0/RdRp | Reunion Island | 1999-2000 |
| <b>AJ621167</b> | P0/RdRp | Reunion Island | 1999-2000 |
| <b>AJ621168</b> | P0/RdRp | Reunion Island | 1999-2000 |
| <b>AJ621169</b> | P0/RdRp | Reunion Island | 1999-2000 |
| <b>AJ621170</b> | P0/RdRp | Reunion Island | 1999-2000 |
| <b>AJ621171</b> | P0/RdRp | Reunion Island | 1999-2000 |
| <b>AJ621172</b> | P0/RdRp | Reunion Island | 1999-2000 |
| <b>AJ621173</b> | P0/RdRp | Reunion Island | 1999-2000 |
| <b>AJ621174</b> | P0/RdRp | Reunion Island | 1999-2000 |
| <b>AJ621175</b> | P0/RdRp | Reunion Island | 1999-2000 |
| <b>AJ621176</b> | P0/RdRp | Reunion Island | 1999-2000 |
| <b>AJ621177</b> | P0/RdRp | Reunion Island | 1999-2000 |
| <b>AJ621178</b> | P0/RdRp | Reunion Island | 1999-2000 |
| <b>AJ621179</b> | P0/RdRp | Peru           | 1999-2000 |
| <b>AJ621180</b> | P0/RdRp | Brazil         | 1999-2000 |
| <b>AJ621181</b> | P0/RdRp | Cuba           | 1999-2000 |
| <b>AJ621182</b> | P0/RdRp | Cuba           | 1999-2000 |
| <b>AM072623</b> | RdRp    | Brazil         | 1999-2000 |
| <b>AM072624</b> | RdRp    | Colombia       | 1999-2000 |
| <b>AM072625</b> | RdRp    | Sri-Lanka      | 1999-2000 |
| <b>AM072626</b> | RdRp    | Martinique     | 1999-2000 |
| <b>AM072627</b> | RdRp    | Peru           | 1999-2000 |
| <b>AM072628</b> | RdRp    | Philippines    | 1999-2000 |
| <b>AM072629</b> | RdRp    | Reunion Island | 1999-2000 |
| <b>AM072630</b> | RdRp    | Taiwan         | 1999-2000 |
| <b>AM072631</b> | CP/MP   | USA            | 1999-2000 |
| <b>AM072632</b> | RdRp    | USA            | 1999-2000 |
| <b>AM072633</b> | RdRp    | Reunion Island | 1999-2000 |
| <b>AM072634</b> | RdRp    | Reunion Island | 1999-2000 |
| <b>AM072635</b> | RdRp    | Reunion Island | 1999-2000 |
| <b>AM072636</b> | RdRp    | Reunion Island | 1999-2000 |
| <b>AM072637</b> | RdRp    | Reunion Island | 1999-2000 |
| <b>AM072638</b> | RdRp    | Reunion Island | 1999-2000 |
| <b>AM072639</b> | RdRp    | Reunion Island | 1999-2000 |
| <b>AM072640</b> | RdRp    | Reunion Island | 1999-2000 |
| <b>AM072641</b> | RdRp    | Reunion Island | 1999-2000 |
| <b>AM072642</b> | RdRp    | Reunion Island | 1999-2000 |
| <b>AM072643</b> | RdRp    | Reunion Island | 1999-2000 |
| <b>AM072644</b> | RdRp    | Reunion Island | 1999-2000 |
| <b>AM072645</b> | RdRp    | Reunion Island | 1999-2000 |

|                 |       |                |           |
|-----------------|-------|----------------|-----------|
| <b>AM072646</b> | RdRp  | Reunion Island | 1999-2000 |
| <b>AM072647</b> | RdRp  | Reunion Island | 1999-2000 |
| <b>AM072648</b> | RdRp  | Reunion Island | 1999-2000 |
| <b>AM072649</b> | RdRp  | Reunion Island | 1999-2000 |
| <b>AM072652</b> | RdRp  | Reunion Island | 1999-2000 |
| <b>AM072654</b> | RdRp  | Reunion Island | 1999-2000 |
| <b>AM072655</b> | RdRp  | Reunion Island | 1999-2000 |
| <b>AM072656</b> | RdRp  | Reunion Island | 1999-2000 |
| <b>AM072750</b> | GN    | Brazil         | 2002-2006 |
| <b>AM072751</b> | GN    | China          | 2002-2006 |
| <b>AM072752</b> | GN    | Peru           | 2002-2006 |
| <b>AM072753</b> | GN    | Peru           | 2002-2006 |
| <b>AM072754</b> | GN    | Reunion Island | 2002-2006 |
| <b>AM072755</b> | GN    | Reunion Island | 2002-2006 |
| <b>AM072756</b> | GN    | Reunion Island | 2002-2006 |
| <b>AM083988</b> | RdRp  | Cuba           | 1999-2000 |
| <b>AM085305</b> | RdRp  | Reunion Island | 1999-2000 |
| <b>AM085306</b> | RdRp  | Reunion Island | 2002-2006 |
| <b>AM085307</b> | RdRp  | Reunion Island | 2002-2006 |
| <b>EF635930</b> | CP/MP | India          | 2007      |
| <b>EF635931</b> | CP/MP | India          | 2007      |
| <b>EF635932</b> | CP/MP | India          | 2007      |
| <b>EF635933</b> | CP/MP | India          | 2007      |
| <b>EF635934</b> | CP/MP | India          | 2007      |
| <b>EF635935</b> | CP/MP | India          | 2007      |
| <b>EF635936</b> | CP/MP | India          | 2007      |
| <b>EF635937</b> | CP/MP | India          | 2007      |
| <b>EF635938</b> | CP/MP | India          | 2007      |
| <b>EF635939</b> | CP/MP | India          | 2007      |
| <b>EF635940</b> | CP/MP | India          | 2007      |
| <b>EF635941</b> | CP/MP | India          | 2007      |
| <b>EF635942</b> | CP/MP | India          | 2007      |
| <b>EF635943</b> | CP/MP | India          | 2007      |
| <b>EF635944</b> | CP/MP | India          | 2007      |
| <b>EF635945</b> | CP/MP | India          | 2007      |
| <b>EF635946</b> | CP/MP | India          | 2007      |
| <b>EU089687</b> | CP/MP | India          | 2007      |
| <b>EU089688</b> | CP/MP | India          | 2007      |
| <b>EU089689</b> | CP/MP | India          | 2007      |
| <b>FJ430661</b> | CP/MP | India          | 2008      |
| <b>FJ430662</b> | CP/MP | India          | 2008      |
| <b>FJ430663</b> | CP/MP | India          | 2008      |
| <b>FJ430664</b> | CP/MP | India          | 2008      |
| <b>FJ430665</b> | CP/MP | India          | 2008      |
| <b>FJ430666</b> | CP/MP | India          | 2008      |
| <b>FJ430667</b> | CP/MP | India          | 2008      |
| <b>FJ430668</b> | CP/MP | India          | 2008      |
| <b>FJ430669</b> | CP/MP | India          | 2008      |
| <b>FJ430670</b> | CP/MP | India          | 2008      |
| <b>FJ430671</b> | CP/MP | India          | 2008      |

|                 |       |       |       |
|-----------------|-------|-------|-------|
| <b>FJ430672</b> | CP/MP | India | 2008  |
| <b>FJ430673</b> | CP/MP | India | 2008  |
| <b>NC_00874</b> | GN    | USA   | 1990s |

\*Gene sequences used in this study (GN = Full-length genome; P0 = P0 protein gene; RdRp = RNA-dependent RNA polymerase gene; CP = Coat protein gene; MP = Movement protein gene; RTD = Read-through domain gene).

SUPPLEMENTARY TABLE 9. Summary of sequence data, country of origin, and date of isolation of *Turnip yellows virus* isolates.

| <b>Accession N°</b> | <b>Gene*</b> | <b>Isolate origin</b> | <b>Date</b> |
|---------------------|--------------|-----------------------|-------------|
| DQ973125            | RdRp/CP/MP   | China                 | 2006        |
| EF079903            | RdRp/CP/MP   | China                 | 2006        |
| EF079904            | RdRp/CP/MP   | China                 | 2006        |
| EF079905            | RdRp/CP/MP   | China                 | 2006        |
| EF079906            | RdRp/CP/MP   | China                 | 2006        |
| EF079907            | RdRp/CP/MP   | China                 | 2006        |
| EF079908            | RdRp/CP/MP   | China                 | 2006        |
| EF090905            | RdRp/CP/MP   | China                 | 2006        |
| EF126150            | RdRp/CP/MP   | China                 | 2006        |
| EU022489            | P0/RdRp      | Poland                | 2005        |
| EU022508            | CP/MP        | Poland                | 2005        |
| L39966              | RdRp/CP/MP   | Belgium               | 1991        |
| L39967              | RdRp/CP/MP   | France                | 1991        |
| L39968              | RdRp/CP/MP   | UK                    | 1989        |
| L39970              | RdRp/CP/MP   | UK                    | 1989        |
| L39971              | RdRp/CP/MP   | France                | 1991        |
| L39973              | RdRp/CP/MP   | UK                    | 1990        |
| L39974              | RdRp/CP/MP   | UK                    | 1990        |
| L39975              | RdRp/CP/MP   | UK                    | 1990        |
| L39976              | RdRp/CP/MP   | UK                    | 1990        |
| L39977              | RdRp/CP/MP   | Italy                 | 1988        |
| L39978              | RdRp/CP/MP   | Italy                 | 1988        |
| L39979              | RdRp/CP/MP   | Italy                 | 1988        |
| L39980              | RdRp/CP/MP   | Italy                 | 1988        |
| L39981              | RdRp/CP/MP   | UK                    | 1980        |
| L39986              | RdRp/CP/MP   | UK                    | 1990        |
| L39987              | RdRp/CP/MP   | Spain                 | 1991        |
| L40011              | RdRp/CP/MP   | UK                    | 1989        |
| L40012              | RdRp/CP/MP   | UK                    | 1989        |
| L40013              | RdRp/CP/MP   | Netherlands           | 1988        |
| L40014              | RdRp/CP/MP   | Belgium               | 1988        |
| L40015              | RdRp/CP/MP   | Netherlands           | 1988        |
| L40016              | RdRp/CP/MP   | France                | 1988        |
| L40017              | RdRp/CP/MP   | France                | 1988        |
| NC_003743           | GN           | France                | 1980        |
| Y16867              | P0/RdRp      | Germany               | 1990s       |
| Y16868              | P0/RdRp      | Germany               | 1990s       |
| Y16869              | P0/RdRp      | France                | 1990s       |
| Y16870              | P0/RdRp      | UK                    | 1990s       |
| Y16871              | P0/RdRp      | UK                    | 1990s       |
| Y16872              | P0/RdRp      | Germany               | 1990s       |
| Y16873              | P0/RdRp      | Germany               | 1990s       |
| Y16874              | P0/RdRp      | Germany               | 1990s       |
| Y16875              | P0/RdRp      | Germany               | 1990s       |
| Y16876              | P0/RdRp      | Germany               | 1990s       |
| Y16877              | P0/RdRp      | Germany               | 1990s       |

---

|               |         |         |       |
|---------------|---------|---------|-------|
| <b>Y16878</b> | P0/RdRp | Germany | 1990s |
|---------------|---------|---------|-------|

---

\*Gene sequences used in this study (GN = Full-length genome; P0 = P0 protein gene; RdRp = RNA-dependent RNA polymerase gene; CP = Coat protein gene; MP = Movement protein gene; RTD = Read-through domain gene).

SUPPLEMENTARY TABLE 10. Estimates of amino acid substitution rates and age of diversity (TMRCA) for *Luteoviridae* species.

| Virus <sup>a</sup> | Date range | N <sup>b</sup> | Parameter             | Gene                                          |                                                |                                                |                                               |
|--------------------|------------|----------------|-----------------------|-----------------------------------------------|------------------------------------------------|------------------------------------------------|-----------------------------------------------|
|                    |            |                |                       | P0                                            | RdRp                                           | CP                                             | RTD                                           |
| BYDV (L)           | 1917-2008  | 0-48-335-41    | Sub rate <sup>c</sup> | -                                             | 2.2×10 <sup>-3</sup>                           | 1.4×10 <sup>-3</sup>                           | 3.4×10 <sup>-4</sup>                          |
|                    |            |                | HPD <sup>d</sup>      | -                                             | (3.9×10 <sup>-4</sup> -4.2×10 <sup>-3</sup> )  | (8.2×10 <sup>-4</sup> -1.9×10 <sup>-3</sup> )  | (2.7×10 <sup>-6</sup> -8.1×10 <sup>-4</sup> ) |
|                    |            |                | TMRCA <sup>e</sup>    | -                                             | 155                                            | 369                                            | 6108*                                         |
| SbDV (L)           | 1990-2007  | 0-13-44-34     | HPD <sup>d</sup>      | -                                             | (201-23)                                       | (708-201)                                      | (12596-545)                                   |
|                    |            |                | Sub rate              | -                                             | 2.9×10 <sup>-4*</sup>                          | 5.0×10 <sup>-4</sup>                           | 1.3×10 <sup>-3</sup>                          |
|                    |            |                | HPD                   | -                                             | (4.0×10 <sup>-17</sup> -1.8×10 <sup>-3</sup> ) | (1.5×10 <sup>-4</sup> -9.1×10 <sup>-4</sup> )  | (3.3×10 <sup>-4</sup> -2.6×10 <sup>-3</sup> ) |
| BChV (P)           | 1985-2005  | 15-21-21-5     | TMRCA                 | -                                             | 52*                                            | 129                                            | 211                                           |
|                    |            |                | HPD                   | -                                             | 4000-10                                        | 379-55                                         | 231-24                                        |
|                    |            |                | Sub rate              | 1.1×10 <sup>-2</sup>                          | 2.4×10 <sup>-3</sup>                           | 1.3×10 <sup>-3</sup>                           | ND                                            |
| BMV (P)            | 1980-2005  | 25-25-20-5     | HPD                   | (2.5×10 <sup>-3</sup> -1.8×10 <sup>-2</sup> ) | (2.8×10 <sup>-4</sup> -4.5×10 <sup>-3</sup> )  | (8.4×10 <sup>-5</sup> -3.0×10 <sup>-3</sup> )  | ND                                            |
|                    |            |                | TMRCA                 | 13                                            | 25                                             | 35                                             | ND                                            |
|                    |            |                | HPD                   | (14-12)                                       | (56-20)                                        | (204-20)                                       | ND                                            |
| CABYV (P)          | 2003-2008  | 1-27-47-1      | Sub rate              | 4.1×10 <sup>-4</sup>                          | 4.2×10 <sup>-4</sup>                           | 7.1×10 <sup>-5*</sup>                          | ND                                            |
|                    |            |                | HPD                   | (1.7×10 <sup>-6</sup> -9.6×10 <sup>-4</sup> ) | (4.8×10 <sup>-6</sup> -3.5×10 <sup>-4</sup> )  | (2.3×10 <sup>-10</sup> -2.6×10 <sup>-4</sup> ) | ND                                            |
|                    |            |                | TMRCA                 | 217                                           | 74                                             | 146*                                           | ND                                            |
| CYDV (P)           | 1925-2006  | 5-32-75-8      | HPD                   | (732-37)                                      | (396-32)                                       | (8000-30)                                      | ND                                            |
|                    |            |                | Sub rate              | ND                                            | 4.7×10 <sup>-3</sup>                           | 9.6×10 <sup>-3</sup>                           | ND                                            |
|                    |            |                | HPD                   | ND                                            | (8.5×10 <sup>-4</sup> -9.3×10 <sup>-3</sup> )  | (5.4×10 <sup>-3</sup> -1.4×10 <sup>-2</sup> )  | ND                                            |
| PLRV (P)           | 1974-2008  | 35-36-31-18    | TMRCA                 | ND                                            | 220                                            | 20                                             | ND                                            |
|                    |            |                | HPD                   | ND                                            | (432-19)                                       | (21-19)                                        | ND                                            |
|                    |            |                | Sub rate              | ND                                            | 3.0×10 <sup>-3</sup>                           | 2.6×10 <sup>-3</sup>                           | 3.6×10 <sup>-3</sup>                          |
| ScYLV (P)          | 1989-2008  | 59-104-80-31   | HPD                   | ND                                            | (4.7×10 <sup>-5</sup> -7.4×10 <sup>-3</sup> )  | (8.8×10 <sup>-4</sup> -4.1×10 <sup>-3</sup> )  | (1.2×10 <sup>-4</sup> -8.4×10 <sup>-3</sup> ) |
|                    |            |                | TMRCA                 | ND                                            | 110                                            | 586                                            | 40                                            |
|                    |            |                | HPD                   | ND                                            | (238-19)                                       | (613-207)                                      | (98-29)                                       |
| TuYV (P)           | 1980-2006  | 15-48-34-1     | Sub rate              | 3.4×10 <sup>-5*</sup>                         | 5.1×10 <sup>-5*</sup>                          | 7.2×10 <sup>-5*</sup>                          | 7.8×10 <sup>-5*</sup>                         |
|                    |            |                | HPD                   | (7.1×10 <sup>-7</sup> -1.0×10 <sup>-4</sup> ) | (4.1×10 <sup>-8</sup> -1.5×10 <sup>-4</sup> )  | (5.8×10 <sup>-7</sup> -1.9×10 <sup>-4</sup> )  | (1.7×10 <sup>-8</sup> -2.2×10 <sup>-4</sup> ) |
|                    |            |                | TMRCA                 | 819*                                          | 428*                                           | 132*                                           | 388*                                          |
| ScYLV (P)          | 1989-2008  | 59-104-80-31   | HPD                   | 6260-45                                       | 6094-46                                        | 1894-44                                        | 5330-44                                       |
|                    |            |                | Sub rate              | 9.4×10 <sup>-4</sup>                          | 7.5×10 <sup>-4</sup>                           | 1.7×10 <sup>-3</sup>                           | 1.0×10 <sup>-4*</sup>                         |
|                    |            |                | HPD                   | (2.3×10 <sup>-4</sup> -1.7×10 <sup>-3</sup> ) | (4.4×10 <sup>-4</sup> -1.1×10 <sup>-3</sup> )  | (8.4×10 <sup>-4</sup> -2.8×10 <sup>-3</sup> )  | (3.5×10 <sup>-7</sup> -2.4×10 <sup>-3</sup> ) |
| TuYV (P)           | 1980-2006  | 15-48-34-1     | TMRCA                 | 21                                            | 269                                            | 19                                             | 400*                                          |
|                    |            |                | HPD                   | (44-20)                                       | (436-131)                                      | (21-18)                                        | (1033-178)                                    |
|                    |            |                | Sub rate              | 6.0×10 <sup>-3</sup>                          | 9.3×10 <sup>-4</sup>                           | 6.8×10 <sup>-4</sup>                           | ND                                            |
|                    |            |                | HPD                   | (1.2×10 <sup>-4</sup> -1.4×10 <sup>-2</sup> ) | (2.3×10 <sup>-5</sup> -2.0×10 <sup>-3</sup> )  | (2.2×10 <sup>-4</sup> -1.2×10 <sup>-3</sup> )  | ND                                            |

|  | TMRCA | 32       | 34       | 47       | ND |
|--|-------|----------|----------|----------|----|
|  | HPD   | (377-29) | (181-29) | (136-36) | ND |

<sup>a</sup> Virus species. The genus is indicated in parenthesis (L: *Luteovirus*; P: *Polerovirus*).

<sup>b</sup> Number of sequences for each gene (P0-RdRp-CP-RTD).

<sup>c</sup> Amino acid substitution rate (subs/residue/year).

<sup>d</sup> 95% Highest Probability Density (HPD) values.

<sup>e</sup> Time to the Most Common Ancestor (TMRCA; years ago).

\* Unreliable estimates.

ND: Not determined estimates due to low number of sequences.

P0 = P0 gene; RdRp = RNA-dependent RNA polymerase; CP = Coat protein; RTD = Read-through domain.
